# Supplementary material
Source: ML conference proceedings conference paper supplement (https://openaccess.thecvf.com/content/cvpr_2017/html/Zhang_On_the_Global_2017_CVPR_paper.html)
Supplement: Supplementary file 1 [file Zhang_On_the_Global_2017_CVPR_supplemental.pdf]

# Supplementary Material for CVPR Submission 2020

Anonymous Authors

April 10, 2017

## Abstract

This supplementary material contains a complete proof of Theorem 2.1 and Lemma 3.1 of the main paper. Section 1 discusses some technical notations and geometric observations, Section 2 and 3 restates and shows a complete proof for the theorem and lemma respectively, and Section 4 contains two auxiliary lemmas used in the main proof.

## 1 Notations and Recaps

Before commencing our main proof, we introduce some notations, recap the simplified objective function  $\hat{\varphi}$  and a few basic observations on its geometry. In this note, we use  $C_a$  or  $C_{\tilde{a}}$  exchangeably to denote the  $m \times m$  circulant matrix generated by a  $k$ -length short convolutional kernel  $a$  without ambiguity.

**Reversed Circulant Matrix** Let  $\check{C}_{a_0}$  be the reversed circulant matrix for  $a_0$  such that

$$\check{C}_{a_0} = [ s_0 [\tilde{a}_0] \mid s_{-1} [\tilde{a}_0] \mid s_{-2} [\tilde{a}_0] \mid \dots \mid s_{-(m-1)} [\tilde{a}_0] ] \in \mathbb{R}^{m \times m}, \quad (1.1)$$

Here,  $s_\tau [\tilde{a}_0]$  denotes a cyclic shift as defined in Equation (3) of the main paper. Since the  $i$ -th entry of  $C_a^* \tilde{a}_0$  satisfies

$$[C_a^* \tilde{a}_0]_i = \langle s_i [\tilde{a}], \tilde{a}_0 \rangle = \langle \tilde{a}, s_{-i} [\tilde{a}_0] \rangle = \langle a, \iota^* s_{-i} [\tilde{a}_0] \rangle, \quad (1.2)$$

therefore following equation always holds

$$C_a^* \tilde{a}_0 = \check{C}_{a_0}^* \tilde{a}. \quad (1.3)$$

**Projection onto  $I$**  Let  $e_0, \dots, e_{m-1}$  denote the standard basis vectors. For index set  $I = \{i_1, \dots, i_{|I|}\} \neq \emptyset$ , let

$$V_I \doteq [e_{i_1} \mid e_{i_2} \mid \dots \mid e_{i_{|I|}}] \in \mathbb{R}^{m \times |I|}, \quad (1.4)$$

and then

$$P_I = V_I V_I^* \quad (1.5)$$

denote the projection onto the coordinates indexed by  $I$  while setting other entries zero.

**Partial Signed Support** Let  $u, v$  be two vectors of the same dimension. If  $\text{supp}(u) \subseteq \text{supp}(v)$  and  $u(i)v(i) \geq 0$  for all  $i \in \text{supp}(v)$ , then  $u$  attains the partial signed support of  $v$ , denoted as  $u \preceq v$ .

**Piecewise Quadratic Function** Let  $\mathbf{x}^*(\mathbf{a})$  denote the minimizer for simplified objective function

$$\widehat{\varphi}(\mathbf{a}) = \min_{\mathbf{x}} \frac{1}{2} \|\widetilde{\mathbf{a}}_0\|_2^2 + \frac{1}{2} \|\mathbf{x}\|_2^2 - \langle \mathbf{a} \circledast \mathbf{x}, \widetilde{\mathbf{a}}_0 \rangle + \lambda \|\mathbf{x}\|_1, \quad (1.6)$$

with sign  $\boldsymbol{\sigma}$  and support  $I$  defined as

$$\boldsymbol{\sigma} \doteq \text{sign}(\mathbf{x}^*(\mathbf{a})) \in \{-1, 0, 1\}^m, \quad I \doteq \text{supp}(\boldsymbol{\sigma}) \subseteq \{0, 1, \dots, m-1\}^1. \quad (1.7)$$

By stationary condition for  $\mathbf{x}^*(\mathbf{a})$ , we obtain

$$\mathbf{x}^*(\mathbf{a}) = \text{SOFT}_{\lambda}[\mathbf{C}_{\mathbf{a}}^* \widetilde{\mathbf{a}}_0] = \text{SOFT}_{\lambda}[\check{\mathbf{C}}_{\mathbf{a}_0}^* \boldsymbol{\iota} \mathbf{a}], \quad (1.8)$$

where  $\text{SOFT}_{\lambda}[u] = \text{sign}(u) \max\{|u| - \lambda, 0\}$  is the entry-wise soft-thresholding operator.

For each sign pattern  $\boldsymbol{\sigma} = \text{supp}(\mathbf{x}^*) \in \{-1, 0, 1\}^m$ , there exists corresponding region on the sphere such that

$$R_{\boldsymbol{\sigma}} = \{\mathbf{a} \mid \text{sign}(\text{SOFT}_{\lambda}[\check{\mathbf{C}}_{\mathbf{a}_0}^* \boldsymbol{\iota} \mathbf{a}]) = \boldsymbol{\sigma}\}. \quad (1.9)$$

On the relative interior of each  $R_{\boldsymbol{\sigma}}$ , the function  $\widehat{\varphi}$  has a simple expression:

$$\widehat{\varphi}(\mathbf{a}) = \widehat{\varphi}_{\boldsymbol{\sigma}}(\mathbf{a}) \doteq -\frac{1}{2} \mathbf{a}^* \boldsymbol{\iota}^* \check{\mathbf{C}}_{\mathbf{a}_0} \mathbf{P}_I \check{\mathbf{C}}_{\mathbf{a}_0}^* \boldsymbol{\iota} \mathbf{a} + \lambda \boldsymbol{\sigma}^* \mathbf{P}_I \check{\mathbf{C}}_{\mathbf{a}_0}^* \boldsymbol{\iota} \mathbf{a} + \frac{1}{2} - \frac{\lambda^2 |I|}{2}. \quad (1.10)$$

Therefore, the objective function is piecewise quadratic and can be rewritten as

$$\widehat{\varphi}_{\boldsymbol{\sigma}} = \frac{1}{2} \mathbf{a}^* \mathbf{M}_{\boldsymbol{\sigma}} \mathbf{a} + \mathbf{b}_{\boldsymbol{\sigma}}^* \mathbf{a} + \text{Const}_{\boldsymbol{\sigma}}, \quad (1.11)$$

with

$$\mathbf{M}_{\boldsymbol{\sigma}} = -\boldsymbol{\iota}^* \check{\mathbf{C}}_{\mathbf{a}_0} \mathbf{P}_I \check{\mathbf{C}}_{\mathbf{a}_0}^* \boldsymbol{\iota}, \quad \mathbf{b}_{\boldsymbol{\sigma}} = \lambda \boldsymbol{\iota}^* \check{\mathbf{C}}_{\mathbf{a}_0} \mathbf{P}_I \boldsymbol{\sigma}. \quad (1.12)$$

With above notations clarified, we are now ready to present a proof for the main theorem.

## 2 Proof of Theorem 2.1

**Theorem 2.1** *Let*

$$\Xi = \{\text{sign}(\text{SOFT}_{\lambda}[\check{\mathbf{C}}_{\mathbf{a}_0}^* \boldsymbol{\iota} \mathbf{a}]) \mid \mathbf{a} \in \mathbb{S}^{k-1}\}. \quad (2.1)$$

*Define*  $\mathcal{I} = \{\text{supp}(\boldsymbol{\sigma}) \mid \boldsymbol{\sigma} \in \Xi\}$ . *For each nonempty*  $I = \{i_1 < i_2 < \dots < i_{|I|}\} \in \mathcal{I}$ , *let*

$$\mathbf{W}_I = \left[ \begin{array}{c} \frac{\boldsymbol{\iota}^* s_{-i_1}[\widetilde{\mathbf{a}}_0]}{\|\boldsymbol{\iota}^* s_{-i_1}[\widetilde{\mathbf{a}}_0]\|_2} \mid \frac{\boldsymbol{\iota}^* s_{-i_2}[\widetilde{\mathbf{a}}_0]}{\|\boldsymbol{\iota}^* s_{-i_2}[\widetilde{\mathbf{a}}_0]\|_2} \mid \dots \mid \frac{\boldsymbol{\iota}^* s_{-i_{|I|}}[\widetilde{\mathbf{a}}_0]}{\|\boldsymbol{\iota}^* s_{-i_{|I|}}[\widetilde{\mathbf{a}}_0]\|_2} \end{array} \right] \in \mathbb{R}^{k \times |I|} \quad (2.2)$$

*Suppose that for every*  $I \in \mathcal{I}$  *of size greater than one,*

$$\|\mathbf{W}_I^* \mathbf{W}_I - \mathbf{I}\|_{\ell^2 \rightarrow \ell^2} < \frac{\lambda^2}{6} \quad (2.3)$$

*and that*  $\lambda < 1$ . *Then every local minimum*  $\bar{\mathbf{a}}$  *of*  $\widehat{\varphi}$  *over*  $\mathbb{S}^{k-1}$  *satisfies either*  $\bar{\mathbf{a}} \in R_0$  *(in which case*  $\bar{\mathbf{a}}$  *is also a global maximum), or*

$$\bar{\mathbf{a}} = \pm \frac{\boldsymbol{\iota}^* s_{\tau}[\widetilde{\mathbf{a}}_0]}{\|\boldsymbol{\iota}^* s_{\tau}[\widetilde{\mathbf{a}}_0]\|_2} \quad (2.4)$$

*for some shift*  $\tau$ .

<sup>1</sup>As in the main paper, we assume that  $m$  dimensional vectors are indexed by the integers  $0, 1, \dots, m-1$ .

**Proof** On the relative interior of each  $R_\sigma$ , the simplified objective function

$$\widehat{\varphi}_\sigma = \frac{1}{2} \mathbf{a}^* \mathbf{M}_\sigma \mathbf{a} + \mathbf{b}_\sigma^* \mathbf{a} + c_\sigma \quad (2.5)$$

has Euclidean derivative and Hessian

$$\nabla \widehat{\varphi}_\sigma(\mathbf{a}) = \mathbf{M}_\sigma \mathbf{a} + \mathbf{b}_\sigma, \quad (2.6)$$

$$\nabla^2 \widehat{\varphi}_\sigma(\mathbf{a}) = \mathbf{M}_\sigma. \quad (2.7)$$

As we assume  $\mathbf{a}$  to have unit Frobenius norm, or to live on a sphere, the more natural Riemannian gradient and Hessian are defined as

$$\text{grad}[\widehat{\varphi}_\sigma](\mathbf{a}) = \mathbf{P}_{\mathbf{a}^\perp} \nabla \widehat{\varphi}_\sigma(\mathbf{a}) \quad (2.8)$$

$$= \mathbf{M}_\sigma \mathbf{a} + \mathbf{b}_\sigma - \mathbf{a}(\mathbf{a}^* \mathbf{M}_\sigma \mathbf{a} + \mathbf{b}_\sigma^* \mathbf{a}), \quad (2.9)$$

$$\text{Hess}[\widehat{\varphi}_\sigma](\mathbf{a}) = \mathbf{P}_{\mathbf{a}^\perp} \left( \nabla^2 \widehat{\varphi}_\sigma(\mathbf{a}) - \langle \nabla \widehat{\varphi}_\sigma(\mathbf{a}), \mathbf{a} \rangle \mathbf{I} \right) \mathbf{P}_{\mathbf{a}^\perp} \quad (2.10)$$

$$= \mathbf{P}_{\mathbf{a}^\perp} \left( \mathbf{M}_\sigma - (\mathbf{a}^* \mathbf{M}_\sigma \mathbf{a} + \mathbf{b}_\sigma^* \mathbf{a}) \mathbf{I} \right) \mathbf{P}_{\mathbf{a}^\perp}. \quad (2.11)$$

Here,  $\mathbf{P}_{\mathbf{a}^\perp} = \mathbf{I} - \mathbf{a}\mathbf{a}^*$  denotes projection onto the tangent space over the sphere at  $\mathbf{a}$ . As in the Euclidean space, a stationary point on the sphere needs to satisfy  $\text{grad}[\widehat{\varphi}_\sigma](\mathbf{a}) = \mathbf{0}$ . At a stationary point  $\bar{\mathbf{a}}$ , if  $\text{Hess}[\widehat{\varphi}_\sigma](\bar{\mathbf{a}})$  is positive semidefinite, the function is convex and  $\bar{\mathbf{a}}$  is a local minimum; if  $\text{Hess}[\widehat{\varphi}_\sigma](\bar{\mathbf{a}})$  has a negative eigenvalue, then there exists a direction along which the objective value decreases and hence  $\bar{\mathbf{a}}$  is a saddle point [AMS07].

Let  $I = \{i_1 < i_2 < \dots < i_{|I|}\}$  and define

$$\eta_i = \|\boldsymbol{\iota}^* s_{-i}[\widetilde{\mathbf{a}}_0]\|_2 \quad \forall i \in I, \quad (2.12)$$

$$\boldsymbol{\eta} = (\eta_{i_1}, \eta_{i_2}, \dots, \eta_{i_{|I|}}) \in \mathbb{R}^{|I|}, \quad (2.13)$$

and

$$\mathbf{U} = \begin{bmatrix} \frac{\sigma_{i_1} \boldsymbol{\iota}^* s_{-i_1}[\widetilde{\mathbf{a}}_0]}{\eta_{i_1}} & \left| \frac{\sigma_{i_2} \boldsymbol{\iota}^* s_{-i_2}[\widetilde{\mathbf{a}}_0]}{\eta_{i_2}} \right| & \dots & \left| \frac{\sigma_{i_{|I|}} \boldsymbol{\iota}^* s_{-i_{|I|}}[\widetilde{\mathbf{a}}_0]}{\eta_{i_{|I|}}} \right| \end{bmatrix} \in \mathbb{R}^{k \times |I|}. \quad (2.14)$$

Here, columns of  $\mathbf{U}$  have unit  $\ell^2$  norm. Then we have

$$\mathbf{M}_\sigma = -\mathbf{U} \text{diag}(\boldsymbol{\eta})^2 \mathbf{U}^*, \quad \mathbf{b}_\sigma = \lambda \mathbf{U} \boldsymbol{\eta}. \quad (2.15)$$

As  $I$  is defined via soft thresholding, we have  $|\check{\mathbf{C}}_{\mathbf{a}_0}^* \boldsymbol{\iota} \mathbf{a}|_i > \lambda$  holds for every  $i \in I$ . Hence,

$$\mathbf{a}^* \mathbf{M}_\sigma \mathbf{a} + \mathbf{b}_\sigma^* \mathbf{a} = -\mathbf{a}^* \boldsymbol{\iota}^* \check{\mathbf{C}}_{\mathbf{a}_0}^* \mathbf{P}_I \check{\mathbf{C}}_{\mathbf{a}_0}^* \boldsymbol{\iota} \mathbf{a} + \lambda \boldsymbol{\sigma}^* \mathbf{P}_I \check{\mathbf{C}}_{\mathbf{a}_0}^* \boldsymbol{\iota} \mathbf{a} \quad (2.16)$$

$$= -\|\mathbf{P}_I \check{\mathbf{C}}_{\mathbf{a}_0}^* \boldsymbol{\iota} \mathbf{a}\|_2^2 + \lambda \|\mathbf{P}_I \check{\mathbf{C}}_{\mathbf{a}_0}^* \boldsymbol{\iota} \mathbf{a}\|_1 \quad (2.17)$$

$$< 0 \quad (2.18)$$

holds at any  $\mathbf{a} \in \text{cl}(R_\sigma) \setminus R_0$ .

**Stationary point and implications** Consider any stationary point  $\bar{\mathbf{a}} \in \text{cl}(R_\sigma) \setminus R_0$  of  $\widehat{\varphi}$ . By continuity of the gradient of  $\widehat{\varphi}$  (proved in Lemma 2.2),  $\bar{\mathbf{a}}$  is also a stationary point of  $\widehat{\varphi}_\sigma$ . By definition,  $\text{grad}[\widehat{\varphi}_\sigma](\bar{\mathbf{a}}) = \mathbf{0}$ , which implies that

$$(\bar{\mathbf{a}}^* \mathbf{M}_\sigma \bar{\mathbf{a}} + \mathbf{b}_\sigma^* \bar{\mathbf{a}}) \bar{\mathbf{a}} = \mathbf{M}_\sigma \bar{\mathbf{a}} + \mathbf{b}_\sigma. \quad (2.19)$$

Note that since  $\bar{\mathbf{a}}^* \mathbf{M}_\sigma \bar{\mathbf{a}} + \mathbf{b}_\sigma^* \bar{\mathbf{a}} \neq 0$  and  $\mathbf{b}_\sigma \in \text{range}(\mathbf{M}_\sigma)$ , this implies that  $\bar{\mathbf{a}} \in \text{range}(\mathbf{M}_\sigma)$ .

Let  $\gamma = -(\bar{\mathbf{a}}^* \mathbf{M}_\sigma \bar{\mathbf{a}} + \mathbf{b}_\sigma^* \bar{\mathbf{a}}) > 0$ , then the condition for a stationary point  $\bar{\mathbf{a}}$  becomes

$$\gamma \bar{\mathbf{a}} = \mathbf{U} \text{diag}(\boldsymbol{\eta})^2 \mathbf{U}^* \bar{\mathbf{a}} - \lambda \mathbf{U} \boldsymbol{\eta}. \quad (2.20)$$

Let  $\alpha = U^* \bar{a}$ , and note that for each  $j$ ,  $\alpha_j > 0$  and  $\alpha_j \eta_j > \lambda$ . In terms of  $U$ , the stationarity condition becomes

$$\gamma \alpha = U^* U \text{diag}(\eta)^2 \alpha - \lambda U^* U \eta. \quad (2.21)$$

Since the diagonal elements of  $U^* U$  are all ones, and hence can be written as

$$U^* U = I + \Delta. \quad (2.22)$$

We have

$$\gamma \alpha = \text{diag}(\eta)^2 \alpha - \lambda \eta + \Delta \left\{ \text{diag}(\eta)^2 \alpha - \lambda \eta \right\}. \quad (2.23)$$

As  $\alpha \succ \mathbf{0}$  and  $\text{diag}(\eta) \alpha \succ \lambda \cdot \mathbf{1}^2$ , together with an auxiliary Lemma 4.2 proved in Section 4, we have

$$\|\text{diag}(\eta)^2 \alpha - \lambda \eta\|_2 \leq \|\alpha\|_2 \quad (2.24)$$

$$= \|U^* \bar{a}\|_2 \quad (2.25)$$

$$\leq \|U\|_{\ell^2 \rightarrow \ell^2} \quad (2.26)$$

$$\leq \sqrt{3/2}, \quad (2.27)$$

whence

$$\|\Delta \left\{ \text{diag}(\eta)^2 \alpha - \lambda \eta \right\}\|_\infty \leq \sqrt{3/2} \times \|\Delta\|_{\ell^2 \rightarrow \ell^\infty}. \quad (2.28)$$

Suppose that  $\Delta$  is small enough that the right hand side of (2.28) is bounded by  $\lambda^2/2$ , i.e.,

$$\|\Delta\|_{\ell^2 \rightarrow \ell^\infty} \leq \frac{\lambda^2}{\sqrt{6}}. \quad (2.29)$$

Plugging back into the stationary condition  $\text{diag}(\eta)^2 \alpha - \gamma \alpha = \lambda \eta - \Delta \left\{ \text{diag}(\eta)^2 \alpha - \lambda \eta \right\}$  gives

$$(\text{diag}(\eta)^2 - \gamma) \alpha \succ \lambda \eta - \lambda^2/2 \succ \mathbf{0}. \quad (2.30)$$

Since  $\alpha_i < 1$  and  $\eta_i > \lambda$  for all  $i$ , which implies that

$$\gamma < \eta_{\min}^2 - \lambda \eta_{\min} + \lambda^2/2, \quad (2.31)$$

where  $\eta_{\min}$  is the smallest of the  $\eta_i$ .

**Negative curvature in Hessian** Recall the Riemannian Hessian on the sphere is defined as

$$\text{Hess} [\hat{\varphi}_\sigma] (\mathbf{a}) = P_{\mathbf{a}^\perp} \left( M_\sigma - (\mathbf{a}^* M_\sigma \mathbf{a} + \mathbf{b}_\sigma^* \mathbf{a}) I \right) P_{\mathbf{a}^\perp} \quad (2.32)$$

$$= P_{\mathbf{a}^\perp} \left( -U \text{diag}(\eta)^2 U^* + \gamma I \right) P_{\mathbf{a}^\perp}. \quad (2.33)$$

Below argument shows that this Riemannian Hessian has negative eigenvalues. Let  $\tilde{U}$  be an orthonormal matrix generated via

$$\tilde{U} \doteq U (U^* U)^{-1/2} \quad (2.34)$$

Whenever  $\|\Delta\|_{\ell^2 \rightarrow \ell^2} < 1/2$  holds, Lemma 4.2 guarantees  $\|U - \tilde{U}\|_{\ell^2 \rightarrow \ell^2} < 3 \|\Delta\|_{\ell^2 \rightarrow \ell^2}$ . Under this condition, we can lower bound the smallest nonzero eigenvalue of  $U \text{diag}(\eta)^2 U^*$ , as

$$\lambda_{\min}(U \text{diag}(\eta)^2 U^*) = \sigma_{\min}(U \text{diag}(\eta)^2) \quad (2.35)$$

<sup>2</sup>Here,  $\succ$  denotes element-wise inequality between vectors.

$$\geq \left( \max \left\{ \sigma_{\min} \left( \tilde{U} \operatorname{diag}(\boldsymbol{\eta}) \right) - \left\| \mathbf{U} - \tilde{U} \right\| \left\| \operatorname{diag}(\boldsymbol{\eta}) \right\|, 0 \right\} \right)^2 \quad (2.36)$$

$$= \left( \max \left\{ \eta_{\min} - \left\| \mathbf{U} - \tilde{U} \right\| \eta_{\max}, 0 \right\} \right)^2 \quad (2.37)$$

$$\geq \eta_{\min}^2 - 3\eta_{\max}\eta_{\min} \left\| \boldsymbol{\Delta} \right\|_{\ell^2 \rightarrow \ell^2}. \quad (2.38)$$

Since  $\lambda < \eta_{\min} \leq \eta_{\max} \leq 1$ , additionally if  $\left\| \boldsymbol{\Delta} \right\|_{\ell^2 \rightarrow \ell^2} \leq \frac{\lambda}{6}$ , we have

$$3\eta_{\max}\eta_{\min} \left\| \boldsymbol{\Delta} \right\|_{\ell^2 \rightarrow \ell^2} \leq \lambda\eta_{\min} - \lambda^2/2, \quad (2.39)$$

Together with (2.29) and (2.31), we can obtain

$$\lambda_{\min}(\mathbf{U} \operatorname{diag}(\boldsymbol{\eta})^2 \mathbf{U}^*) > \gamma, \quad (2.40)$$

or

$$\lambda_{\max}(\mathbf{M}_{\boldsymbol{\sigma}}) < -\gamma. \quad (2.41)$$

Thus, whenever the following conditions are satisfied

$$\lambda < 1, \quad \left\| \boldsymbol{\Delta} \right\|_{\ell^2 \rightarrow \ell^\infty} \leq \frac{\lambda^2}{\sqrt{6}}, \quad \left\| \boldsymbol{\Delta} \right\|_{\ell^2 \rightarrow \ell^2} \leq \frac{\lambda}{6}, \quad (2.42)$$

we have  $\lambda_{\max}(\mathbf{M}_{\boldsymbol{\sigma}}) < -\gamma$  as desired.

Above calculations imply that for every  $\boldsymbol{\xi} \in \operatorname{range}(\mathbf{M}_{\boldsymbol{\sigma}}) \subseteq \mathbb{R}^k$ ,

$$\boldsymbol{\xi}^* (\mathbf{M}_{\boldsymbol{\sigma}} + \gamma \mathbf{I}) \boldsymbol{\xi} < 0. \quad (2.43)$$

Since

$$\operatorname{Hess} [\hat{\varphi}_{\boldsymbol{\sigma}}] (\bar{\mathbf{a}}) = \mathbf{P}_{\bar{\mathbf{a}}^\perp} \left( \mathbf{M}_{\boldsymbol{\sigma}} + \gamma \mathbf{I} \right) \mathbf{P}_{\bar{\mathbf{a}}^\perp}, \quad (2.44)$$

for  $\boldsymbol{\xi} \in \bar{\mathbf{a}}^\perp \cap \operatorname{range}(\mathbf{M}_{\boldsymbol{\sigma}})$ ,

$$\boldsymbol{\xi}^* \operatorname{Hess} [\hat{\varphi}_{\boldsymbol{\sigma}}] (\bar{\mathbf{a}}) \boldsymbol{\xi} < 0. \quad (2.45)$$

Hence, on the relative interior  $\operatorname{relint}(R_{\boldsymbol{\sigma}})$ ,  $\hat{\varphi} \equiv \hat{\varphi}_{\boldsymbol{\sigma}}$  obtains, and so this implies that for  $\left\| \boldsymbol{\sigma} \right\|_0 > 1$ , there are no local minima in  $\operatorname{relint}(R_{\boldsymbol{\sigma}})$ .

**Relative boundaries** We first note that if  $\left\| \boldsymbol{\sigma} \right\|_0 = 1$  and  $I = \{i\}$ , either  $R_{\boldsymbol{\sigma}}$  is empty when  $\left\| \boldsymbol{\nu}^*_{s-i} [\widetilde{\mathbf{a}}_0] \right\|_2 \leq \lambda$ , or it contains an open ball around  $\operatorname{range}(\mathbf{M}_{\boldsymbol{\sigma}}) \cap \mathbb{S}^{k-1} = \pm \frac{\boldsymbol{\nu}^*_{s-i} [\widetilde{\mathbf{a}}_0]}{\left\| \boldsymbol{\nu}^*_{s-i} [\widetilde{\mathbf{a}}_0] \right\|_2}$ . Hence, if  $\bar{\mathbf{a}} \in \operatorname{relbdy}(R_{\boldsymbol{\sigma}})$  is a stationary point and  $\boldsymbol{\sigma} \neq \mathbf{0}$ , we necessarily have  $\left\| \boldsymbol{\sigma} \right\|_0 \geq 2$ .

Since  $\bar{\mathbf{a}}$  is on the boundary of  $R_{\boldsymbol{\sigma}}$ , it is also in  $\operatorname{relbdy}(\operatorname{cl}(R_{\boldsymbol{\sigma}'}))$  for some  $\boldsymbol{\sigma}' \neq \boldsymbol{\sigma}$ . Let

$$\Xi = \{ \boldsymbol{\sigma}' \mid \bar{\mathbf{a}} \in \operatorname{relbdy}(\operatorname{cl}(R_{\boldsymbol{\sigma}'})) \}. \quad (2.46)$$

Suppose that for every  $\boldsymbol{\sigma}' \in \Xi$ ,  $\boldsymbol{\sigma} \preceq \boldsymbol{\sigma}'$ . Hence,  $\operatorname{range}(\mathbf{M}_{\boldsymbol{\sigma}}) \subseteq \operatorname{range}(\mathbf{M}_{\boldsymbol{\sigma}'})$  for every  $\boldsymbol{\sigma}' \in \Xi$  and

$$\boldsymbol{\xi}^* \operatorname{Hess} [\hat{\varphi}_{\boldsymbol{\sigma}'}] (\bar{\mathbf{a}}) \boldsymbol{\xi} < 0, \quad \forall \boldsymbol{\xi} \in \operatorname{range}(\mathbf{M}_{\boldsymbol{\sigma}}), \boldsymbol{\sigma}' \in \Xi. \quad (2.47)$$

By continuity of the gradients,  $\bar{\mathbf{a}}$  is a stationary point for every  $\hat{\varphi}_{\boldsymbol{\sigma}'}$ , such that  $\boldsymbol{\sigma}' \in \Xi$ . If we choose an arbitrary nonzero  $\boldsymbol{\xi} \in \operatorname{range}(\mathbf{M}_{\boldsymbol{\sigma}})$ , we have that for every  $\boldsymbol{\sigma}' \in \Xi$ ,

$$\hat{\varphi}_{\boldsymbol{\sigma}'}(\mathcal{P}_{\mathbb{S}^{k-1}}[\bar{\mathbf{a}} + t\boldsymbol{\xi}]) < \hat{\varphi}(\bar{\mathbf{a}}) - \Omega(t^2). \quad (2.48)$$

There exists a neighborhood  $N$  of  $\bar{\mathbf{a}}$  for which, at every  $\mathbf{a} \in N \cap R_{\boldsymbol{\sigma}'}$ ,  $\hat{\varphi}(\mathbf{a}) = \hat{\varphi}_{\boldsymbol{\sigma}'}(\mathbf{a}) \leq \hat{\varphi}(\bar{\mathbf{a}})$  for some  $\boldsymbol{\sigma}' \in \Xi$ . Hence,  $\bar{\mathbf{a}}$  is not a local minimum of  $\hat{\varphi}$ .

**Local minima** If  $\|\sigma\|_0 = 1$  and  $I = \{i\}$ , then the simplified objective function is

$$\widehat{\varphi}_\sigma = -\frac{1}{2} \langle \sigma_i \iota^* s_{-i} [\widehat{\mathbf{a}}_0], \mathbf{a} \rangle^2 + \lambda \langle \sigma_i \iota^* s_{-i} [\widehat{\mathbf{a}}_0], \mathbf{a} \rangle + c_\sigma. \quad (2.49)$$

The minimizer appears at the boundary for  $\langle \sigma_i \iota^* s_{-i} [\widehat{\mathbf{a}}_0], \mathbf{a} \rangle$ , namely  $\|\iota^* s_{-i} [\widehat{\mathbf{a}}_0]\|_2$ <sup>3</sup> obtained by

$$\bar{\mathbf{a}} = \sigma_i \frac{\iota^* s_\tau [\widehat{\mathbf{a}}_0]}{\|\iota^* s_\tau [\widehat{\mathbf{a}}_0]\|_2}. \quad (2.50)$$

It can be easily verified that

$$\text{grad} [\widehat{\varphi}_\sigma] (\bar{\mathbf{a}}) = \left( -\|\iota^* s_\tau [\widehat{\mathbf{a}}_0]\|_2^2 + \lambda \|\iota^* s_\tau [\widehat{\mathbf{a}}_0]\|_2 \right) \times (\mathbf{I} - \bar{\mathbf{a}} \bar{\mathbf{a}}^*) \bar{\mathbf{a}} \quad (2.51)$$

$$= \mathbf{0} \quad (2.52)$$

$$\text{Hess} [\widehat{\varphi}_\sigma] (\bar{\mathbf{a}}) = \mathbf{P}_{\mathbf{a}^\perp} \left( -\|\iota^* s_\tau [\widehat{\mathbf{a}}_0]\|_2^2 \bar{\mathbf{a}} \bar{\mathbf{a}}^* + (1 - \lambda \|\iota^* s_\tau [\widehat{\mathbf{a}}_0]\|_2) \mathbf{I} \right) \mathbf{P}_{\mathbf{a}^\perp} \quad (2.53)$$

$$= (1 - \lambda \|\iota^* s_\tau [\widehat{\mathbf{a}}_0]\|_2) \mathbf{P}_{\mathbf{a}^\perp} \mathbf{P}_{\mathbf{a}^\perp} \quad (2.54)$$

$$\succeq 0 \quad (2.55)$$

**Global maxima** If  $\|\sigma\|_0 = 0$ , then the objective remains constant and achieves the global maximum. ■

**Lemma 2.2 (Continuity of the Gradient of  $\widehat{\varphi}$ )**  $\nabla \widehat{\varphi}$  is a continuous function of  $\mathbf{a}$ .

**Proof** Recall that for a given  $\sigma$ , the gradient

$$\nabla \widehat{\varphi}_\sigma (\mathbf{a}) = -\iota^* \check{\mathbf{C}}_{\mathbf{a}_0} \mathbf{P}_I \check{\mathbf{C}}_{\mathbf{a}_0}^* \iota \mathbf{a} + \lambda \iota^* \check{\mathbf{C}}_{\mathbf{a}_0} \mathbf{P}_I \sigma \quad (2.56)$$

$$= -\iota^* \check{\mathbf{C}}_{\mathbf{a}_0} \mathbf{P}_I (\check{\mathbf{C}}_{\mathbf{a}_0}^* \iota \mathbf{a} - \lambda \sigma) \quad (2.57)$$

This is a continuous function within the relative interior of  $R_\sigma$ . Next, we show this function is continuous at the relative boundary of  $R_\sigma$ . Let  $\mathbf{a}' \in \text{relbdy}(R_\sigma)$ , and  $\sigma' = \text{sign}(\mathbf{a}')$ ,  $I = \text{supp}(\sigma')$  are the corresponding sign and support. Without loss of generality, we assume  $\sigma' \preceq \sigma$ , denote  $\mathbf{a} = \mathbf{a}' + \varepsilon \delta$  ( $\|\delta\|_2 = 1$ ) and  $I_\delta = I \setminus I'$ , then

$$\nabla \widehat{\varphi}_\sigma (\mathbf{a}) - \nabla \widehat{\varphi}_{\sigma'} (\mathbf{a}') = -\iota^* \check{\mathbf{C}}_{\mathbf{a}_0} \mathbf{P}_I (\check{\mathbf{C}}_{\mathbf{a}_0}^* \iota \mathbf{a} - \lambda \sigma) + \iota^* \check{\mathbf{C}}_{\mathbf{a}_0} \mathbf{P}_{I'} (\check{\mathbf{C}}_{\mathbf{a}_0}^* \iota \mathbf{a}' - \lambda \sigma') \quad (2.58)$$

$$= -\iota^* \check{\mathbf{C}}_{\mathbf{a}_0} (\mathbf{P}_{I'} + \mathbf{P}_{I_\delta}) (\check{\mathbf{C}}_{\mathbf{a}_0}^* \iota \mathbf{a} - \lambda \sigma) + \iota^* \check{\mathbf{C}}_{\mathbf{a}_0} \mathbf{P}_{I'} (\check{\mathbf{C}}_{\mathbf{a}_0}^* \iota \mathbf{a}' - \lambda \sigma') \quad (2.59)$$

$$= -\iota^* \check{\mathbf{C}}_{\mathbf{a}_0} \mathbf{P}_{I_\delta} (\check{\mathbf{C}}_{\mathbf{a}_0}^* \iota \mathbf{a} - \lambda \sigma) - \varepsilon \iota^* \check{\mathbf{C}}_{\mathbf{a}_0} \mathbf{P}_{I'} \check{\mathbf{C}}_{\mathbf{a}_0}^* \iota \delta \quad (2.60)$$

Since  $\|\mathbf{P}_{I_\delta} (\check{\mathbf{C}}_{\mathbf{a}_0}^* \iota \mathbf{a} - \lambda \sigma)\|_\infty = \varepsilon \|\mathbf{P}_{I_\delta} \check{\mathbf{C}}_{\mathbf{a}_0}^* \iota \delta\|_\infty$ , we have  $\|\nabla \widehat{\varphi}_\sigma (\mathbf{a}) - \nabla \widehat{\varphi}_{\sigma'} (\mathbf{a}')\|_\infty \leq \mathcal{O}(\varepsilon)$ . ■

### 3 Proof of Lemma 3.1

**Lemma 3.1** Let  $\lambda_{rel} = \lambda / \|\mathbf{x}_0\|_\infty$ , suppose the ground truth  $\mathbf{a}_0$  satisfies

$$|\langle \mathbf{a}_0, \iota s_{\tau \neq 0} [\widehat{\mathbf{a}}_0] \rangle| < \lambda_{rel}^2 - (2 + 1/\lambda_{rel}^2) \sqrt{1 - \lambda_{rel}^2} \quad (3.1)$$

for any nonzero shift  $\tau$ , and  $\mathbf{x}_0$  is separated enough such that any two nonzero components are at least  $2k$  entries away from each other. If initialized at some  $\mathbf{a} \in \mathbb{S}^{k-1}$  that  $|\langle \mathbf{a}, \mathbf{a}_0 \rangle| > \lambda / \|\mathbf{x}_0\|_\infty$ , a gradient descent algorithm minimizing  $\varphi(\mathbf{a})$  recovers the signed ground truth  $\pm \mathbf{a}_0$ .

<sup>3</sup>The other boundary point is  $\langle \sigma_i \iota^* s_{-i} [\widehat{\mathbf{a}}_0], \mathbf{a} \rangle = \lambda$ , which achieves a smaller objective value.

**Proof** Without loss of generality, we are going to assume  $\|\mathbf{x}_0\|_\infty = 1$  for simplicity. Given that

$$|\langle \mathbf{a}_0, \iota_{S_{\tau \neq 0}}[\widetilde{\mathbf{a}}_0] \rangle| < \lambda^2 - \sqrt{1 - \lambda^2} (2 + 1/\lambda^2) \quad (3.2)$$

and  $\mathbf{a} = \langle \mathbf{a}, \mathbf{a}_0 \rangle \mathbf{a}_0 + \boldsymbol{\delta}$  with  $\|\boldsymbol{\delta}\|_2 \leq \sqrt{1 - \lambda^2}$ , therefore

$$\begin{aligned} |\langle \mathbf{a}, \iota_{S_\tau}[\mathbf{a}] \rangle| &= |\langle \langle \mathbf{a}, \mathbf{a}_0 \rangle \mathbf{a}_0 + \boldsymbol{\delta}, \iota_{S_\tau}[\langle \mathbf{a}, \mathbf{a}_0 \rangle \mathbf{a}_0 + \boldsymbol{\delta}] \rangle| \\ &\leq \langle \mathbf{a}, \mathbf{a}_0 \rangle^2 |\langle \mathbf{a}_0, \iota_{S_\tau}[\mathbf{a}_0] \rangle| + 2 \langle \mathbf{a}, \mathbf{a}_0 \rangle \|\boldsymbol{\delta}\|_2 + \|\boldsymbol{\delta}\|_2^2 \\ &< 1 - \sqrt{1 - \lambda^2}/\lambda^2 \end{aligned}$$

Moreover, as  $\mathbf{x}_0$  is sufficiently separated, we have

$$\begin{aligned} |\langle \mathbf{a}, \iota_{S_\tau}[\mathbf{a}] \rangle \|\mathbf{x}^*\|_\infty - \langle \mathbf{a}, \iota_{S_\tau}[\mathbf{a}_0] \rangle \|\mathbf{x}_0\|_\infty| &\leq |\langle \mathbf{a}, \iota_{S_\tau}[\mathbf{a}] \rangle| \|\mathbf{x}_0 - \mathbf{x}^*\|_\infty + |\langle \mathbf{a}, \iota_{S_\tau}[\mathbf{a}_0 - \mathbf{a}] \rangle| \|\mathbf{x}_0\|_\infty \\ &< \lambda |\langle \mathbf{a}, \iota_{S_\tau}[\mathbf{a}] \rangle| + \|\mathbf{a}_0 - \mathbf{a}\|_2 \|\mathbf{x}_0\|_\infty \\ &< \lambda. \end{aligned}$$

Hence, there exists a unique nonzero minimizer satisfying  $\text{supp } \mathbf{x}^* \subset \text{supp } \mathbf{x}_0$ , and the optimality condition for  $\mathbf{x}^*$  implies

$$\mathbf{x}^* = \text{SOFT}_\lambda[\langle \mathbf{a}, \mathbf{a}_0 \rangle \mathbf{x}_0], \quad (3.3)$$

In this case, we can calculate the Euclidean gradient

$$\nabla \varphi(\mathbf{a}) = \iota_{C_{\mathbf{x}^*}}(\mathbf{a} \otimes \mathbf{x}^* - \mathbf{a}_0 \otimes \mathbf{x}_0) \quad (3.4)$$

$$= \|\mathbf{x}^*\|_2^2 \mathbf{a} - \langle \mathbf{x}^*, \mathbf{x}_0 \rangle \mathbf{a}_0, \quad (3.5)$$

and the Riemannian gradient

$$\text{grad}[\varphi](\mathbf{a}) = (\mathbf{I} - \mathbf{a}\mathbf{a}^*) \nabla \varphi(\mathbf{a}) \quad (3.6)$$

$$= -\langle \mathbf{x}^*, \mathbf{x}_0 \rangle (\mathbf{I} - \mathbf{a}\mathbf{a}^*) \mathbf{a}_0. \quad (3.7)$$

It's easy to check that at any point along the geodesic curve between  $\mathbf{a}_0$  and  $\mathbf{a}$ , support recovery of  $\mathbf{x}^*$  is achieved and a gradient descent algorithm moves towards the signed ground truth  $\pm \mathbf{a}_0$  as desired. ■

## 4 Auxiliary Lemmas

**Lemma 4.1** (Lemma B.2 of [SQW15]) Suppose that  $\mathbf{A} \succ \mathbf{0}$  is a positive definite matrix. For any symmetric matrix  $\boldsymbol{\Delta}$  with  $\|\boldsymbol{\Delta}\|_{\ell^2 \rightarrow \ell^2} \leq \sigma_{\min}(\mathbf{A})/2$ ,

$$\left\| (\mathbf{A} + \boldsymbol{\Delta})^{-1/2} - \mathbf{A}^{-1/2} \right\|_{\ell^2 \rightarrow \ell^2} \leq \frac{2 \|\mathbf{A}\|_{\ell^2 \rightarrow \ell^2}^{1/2} \|\boldsymbol{\Delta}\|_{\ell^2 \rightarrow \ell^2}}{\sigma_{\min}(\mathbf{A})^2}. \quad (4.1)$$

**Lemma 4.2** Let  $\mathbf{U}$  be a matrix such that  $\mathbf{U}^* \mathbf{U} = \mathbf{I} + \boldsymbol{\Delta}$ , with  $\|\boldsymbol{\Delta}\|_{\ell^2 \rightarrow \ell^2} < 1/2$ . Then  $\mathbf{U}^* \mathbf{U}$  is invertible,

$$\|\mathbf{U}\|_{\ell^2 \rightarrow \ell^2} < \sqrt{3/2}, \quad (4.2)$$

and

$$\left\| \mathbf{U} - \mathbf{U}(\mathbf{U}^* \mathbf{U})^{-1/2} \right\|_{\ell^2 \rightarrow \ell^2} < 3 \|\boldsymbol{\Delta}\|_{\ell^2 \rightarrow \ell^2}. \quad (4.3)$$

**Proof** Upper bound for the first quantity can be derived

$$\|\mathbf{U}\|_{\ell^2 \rightarrow \ell^2} = \sqrt{\|\mathbf{U}^* \mathbf{U}\|_{\ell^2 \rightarrow \ell^2}} \quad (4.4)$$

$$\leq \sqrt{\|\mathbf{I}\|_{\ell^2 \rightarrow \ell^2} + \|\mathbf{\Delta}\|_{\ell^2 \rightarrow \ell^2}} \quad (4.5)$$

$$< \sqrt{3/2}. \quad (4.6)$$

Applying Lemma 4.1 for the second term

$$\left\| \mathbf{U} - \mathbf{U}(\mathbf{U}^* \mathbf{U})^{-1/2} \right\|_{\ell^2 \rightarrow \ell^2} \leq \|\mathbf{U}\|_{\ell^2 \rightarrow \ell^2} \left\| \mathbf{I} - (\mathbf{U}^* \mathbf{U})^{-1/2} \right\|_{\ell^2 \rightarrow \ell^2} \quad (4.7)$$

$$= \|\mathbf{U}\|_{\ell^2 \rightarrow \ell^2} \left\| \mathbf{I}^{-1/2} - (\mathbf{I} + \mathbf{\Delta})^{-1/2} \right\|_{\ell^2 \rightarrow \ell^2} \quad (4.8)$$

$$\leq \sqrt{3/2} \times 2 \|\mathbf{\Delta}\|_{\ell^2 \rightarrow \ell^2}, \quad (4.9)$$

Hence, we can obtain the claim by using  $2\sqrt{3/2} < 3$  to simplify the constant. ■

## References

- [AMS07] P.-A. Absil, R. Mahony, and R. Sepulchre. *Optimization Algorithms on Matrix Manifolds*. Princeton University Press, Princeton, NJ, USA, 2007.
- [SQW15] J. Sun, Q. Qu, and J. Wright. Complete dictionary recovery over the sphere. Preprint, <http://arxiv.org/abs/1504.06785>, 2015.
